# Supplementary material for: Incident Gallstones During Somatostatin Analog Treatment are Associated with Acute Biliary Complications Especially After Discontinuation
Source: PubMed Central journal article supplement — Drugs R D. 2021 Mar 29;21(2):179–88. doi: 10.1007/s40268-021-00342-7 (PMC8206401; doi:10.1007/s40268-021-00342-7), 2021-03-29

Somatostatin analogue associated gallstones

## **SUPPLEMENTARY MATERIAL**

Aapkes, S.E., de Haas, R.J., Bernts, L.H.P., Blijdorp, C.J., Dekker, S.E.I., van Gastel, M.D.A., Meijer, E. Veldman, A., Drenth, J.P.H., Gansevoort, R.T. Incident gallstones during somatostatin analogue treatment are associated with acute biliary complications especially after discontinuation. Drug Safety

### **Correspondence:**

Prof. R.T. Gansevoort, Department of Nephrology, University Medical Center Groningen, Hanzeplein 1, 9700 RB Groningen, The Netherlands. Phone: +3150 3616161, email:

[r.t.gansevoort@umcg.nl](mailto:r.t.gansevoort@umcg.nl)

**Supplementary table 1: Incidence of symptoms possibly indicative of gallstones in ADPKD patients treated with lanreotide with and without incident gallstones during treatment.**

| Patients treated with lanreotide | Incident gallstones<br>during study<br>N (%) | No incident gallstones<br>during study<br>(N%) | <i>P</i> value |
|----------------------------------|----------------------------------------------|------------------------------------------------|----------------|
| <b>Symptoms</b>                  |                                              |                                                |                |
| Abdominal cramps                 | 11 (57.9)                                    | 50 (47.6)                                      | 0.41           |
| Abdominal pain                   | 9 (47.4)                                     | 39 (37.1)                                      | 0.40           |
| Discolored stool                 | 10 (52.6)                                    | 52 (49.5)                                      | 0.80           |
| Hepatic cyst infection           | 0 (0)                                        | 6 (5.7)                                        | 0.29           |

**Supplementary Fig. 1. Treatment duration, discontinuation, and time until complication**

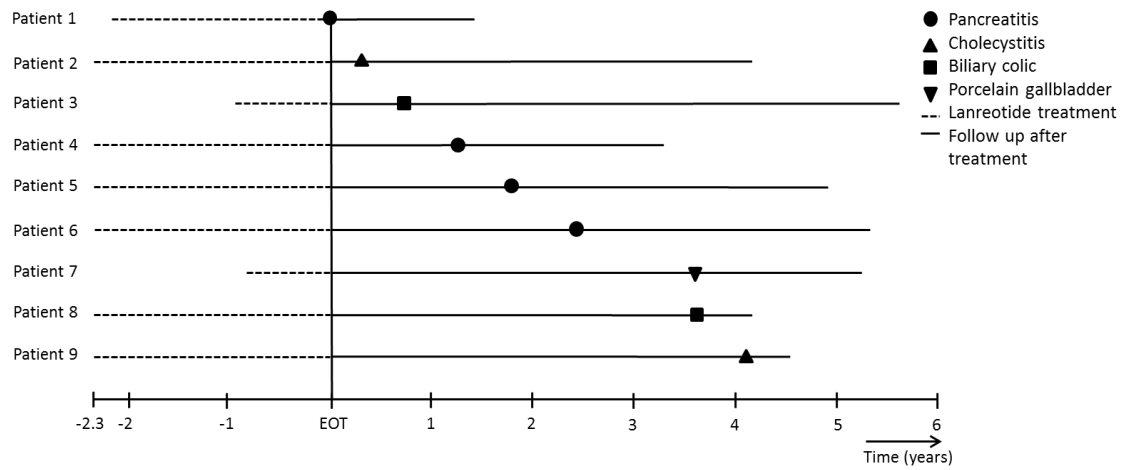

Supplement: 40268_2021_342_MOESM1_ESM.pdf [file 40268_2021_342_MOESM1_ESM.pdf]
